# Supplementary material for: MnO1.88/R-MnO2/Ti3C2(OH/F)x composite electrodes for high-performance pseudo-supercapacitors prepared from reduced MXenes
Source: Royal Society of Chemistry journal article supplement (doi:10.1039/c9nj06201g), 2020-01-01
Supplement: c9nj06201g1.pdf [file c9nj06201g1.pdf]

## Electronic Supplementary Information (ESI)

### **MnO<sub>1.88</sub>/R-MnO<sub>2</sub>/Ti<sub>3</sub>C<sub>2</sub>(OH/F)<sub>x</sub> Composite Electrode for High Performance**

### **Pseudo-Supercapacitor Prepared from Reduced MXene**

Xinhua Huang<sup>a,d</sup>, XingxingZhu<sup>a</sup>, Shaohong Luo<sup>b</sup>, Nitul Rajput<sup>c</sup>, Matteo Chiesa<sup>c</sup>, Liao Kin<sup>b\*</sup>, and  
Vincent Chan<sup>d,\*</sup>

<sup>a</sup>School of Materials Science and Engineering, *Anhui University of Science and Technology*, Huainan, Anhui, 232001, P. R. *China*

<sup>b</sup>Department of Aerospace Engineering, *Khalifa University of Science and Technology*, P O Box 127788, Abu Dhabi, UAE

<sup>c</sup>Department of Mechanical and Materials Engineering, *Khalifa University of Science and Technology*, Masdar Campus, PO Box 54224, Abu Dhabi, UAE

<sup>d</sup>Department of Biomedical Engineering, *Khalifa University of Science and Technology*, P O Box 127788, Abu Dhabi, UAE



Figure S1. SEM images of the MXene-MnOx composites.



**Figure S2.** TEM images of the MXene-MnOx composites.



**Figure S3** The sorption-desorption curves of the Ti<sub>3</sub>C<sub>2</sub>Tx/MnO<sub>x</sub>-2.



**Figure S4** AFM of the  $\text{Ti}_3\text{C}_2\text{T}_x/\text{MnO}_x$ -2 composite demonstrate the single layer.



**Figure S5** Full XPS spectra of the MXene(Mx)-MnO<sub>x</sub> composites.



**Figure S6** The different resolution SEM images of the  $\text{Ti}_3\text{C}_2\text{T}_x/\text{MnO}_x$ -2 as the supercapacitor electrode on nickel foam after 5000 cycles.
